# Supplementary material for: Patterns of Systemic Disease Diagnoses among Medical Professionals in Taiwan: Statistical Analysis and Data Mining
Source: MDPI journal article supplement (doi:10.3390/ijerph192114017), 2022-10-27
Supplement: s1 [file s1]

# Supporting Information

**Figure S1**  
**Flow chart**

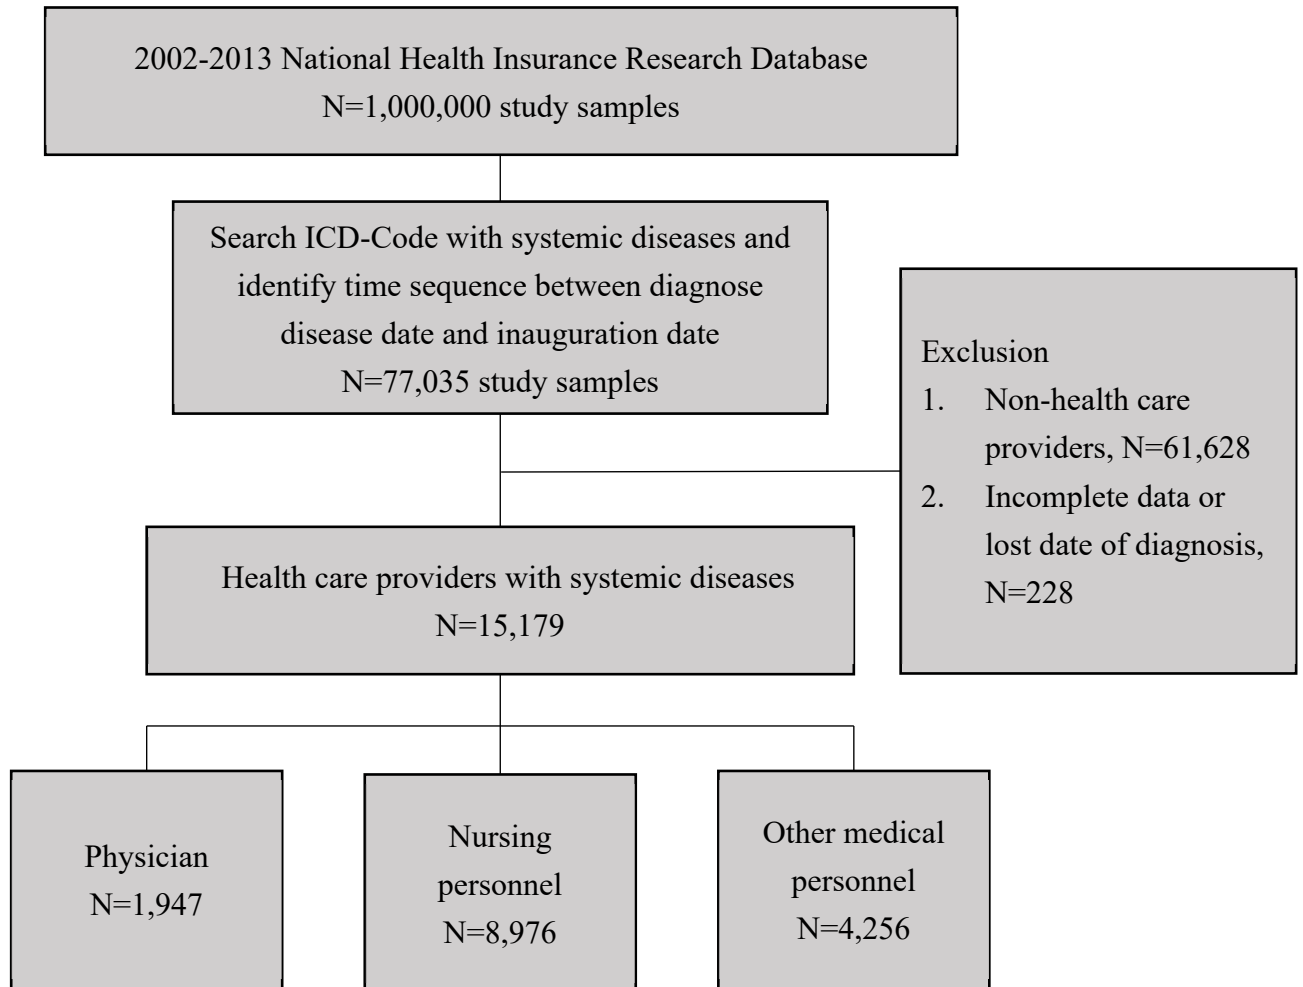

**Table S1.** Association between medical professionals and non-medical professionals in Taiwan with systemic diseases(N=75,981)

|                                              | Adjusted<br>Odd Risk | 95% CI |         | p 值     |
|----------------------------------------------|----------------------|--------|---------|---------|
| Systemic diseases                            |                      |        |         |         |
| non-medical professionals (Ref.)             | -                    | -      |         | -       |
| medical professionals                        | 1.160                | 1.101  | - 1.223 | <0.001* |
| Infectious and parasitic diseases            |                      |        |         |         |
| non-medical professionals (Ref.)             | -                    | -      |         | -       |
| medical professionals                        | 1.196                | 1.083  | - 1.321 | <0.001* |
| Neoplasms                                    |                      |        |         |         |
| non-medical professionals (Ref.)             | -                    | -      |         | -       |
| medical professionals                        | 1.173                | 1.003  | - 1.372 | 0.045*  |
| Endocrine, nutritional, metabolic and        |                      |        |         |         |
| Immune diseases                              |                      |        |         |         |
| non-medical professionals (Ref.)             | -                    | -      |         | -       |
| medical professionals                        | 1.064                | 0.919  | - 1.233 | 0.407   |
| Psychosis                                    |                      |        |         |         |
| non-medical professionals (Ref.)             | -                    | -      |         | -       |
| medical professionals                        | 0.942                | 0.801  | - 1.107 | 0.469   |
| Neurological disorders and eye and adnexa    |                      |        |         |         |
| non-medical professionals (Ref.)             | -                    | -      |         | -       |
| medical professionals                        | 1.005                | 0.939  | - 1.076 | 0.886   |
| Diseases of the circulatory system           |                      |        |         |         |
| non-medical professionals (Ref.)             | -                    | -      |         | -       |
| medical professionals                        | 1.042                | 0.900  | - 1.205 | 0.584   |
| Diseases of the respiratory system           |                      |        |         |         |
| non-medical professionals (Ref.)             | -                    | -      |         | -       |
| medical professionals                        | 0.874                | 0.838  | - 0.912 | <0.001* |
| Digestive Diseases                           |                      |        |         |         |
| non-medical professionals (Ref.)             | -                    | -      |         | -       |
| medical professionals                        | 1.254                | 1.201  | - 1.310 | <0.001* |
| Diseases of the genitourinary system         |                      |        |         |         |
| non-medical professionals (Ref.)             | -                    | -      |         | -       |
| medical professionals                        | 1.014                | 0.947  | - 1.087 | 0.684   |
| Diseases of the skin and subcutaneous tissue |                      |        |         |         |
| non-medical professionals (Ref.)             | -                    | -      |         | -       |
| medical professionals                        | 1.099                | 1.036  | - 1.166 | 0.002*  |

**Diseases of the musculoskeletal system and  
connective tissue**

|                                  |       |       |   |       |         |
|----------------------------------|-------|-------|---|-------|---------|
| non-medical professionals (Ref.) | -     |       |   | -     | -       |
| medical professionals            | 0.866 | 0.801 | - | 0.937 | <0.001* |

---

\*  $p < 0.05$ , \*\*  $p < 0.001$ .
